# Supplementary material for: A One-Year Systematic Study to Assess the Microbiological Profile in Oysters from a Commercial Harvesting Area in Portugal
Source: MDPI journal article supplement (doi:10.3390/microorganisms11020338), 2023-01-29
Supplement: s1 [file s1]

Supplementary Material:

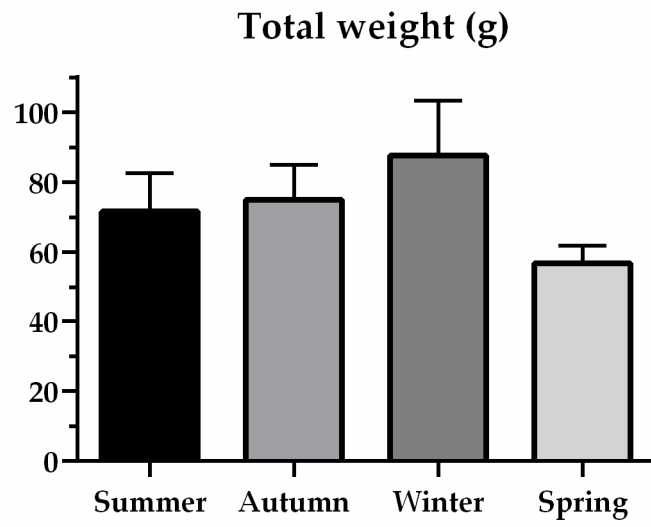

(a)

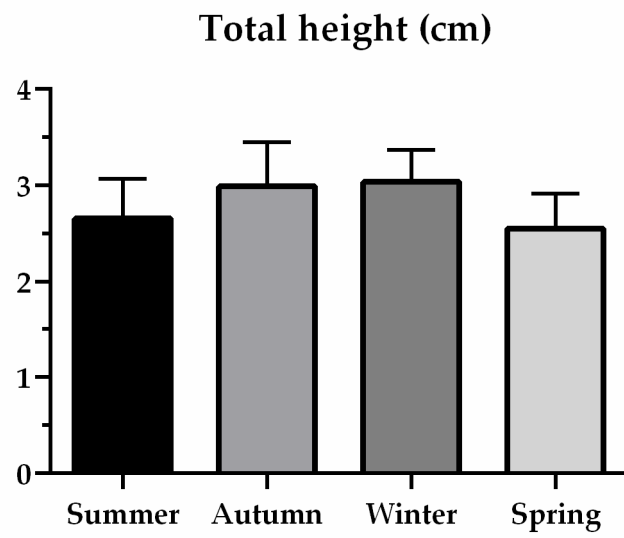

(b)

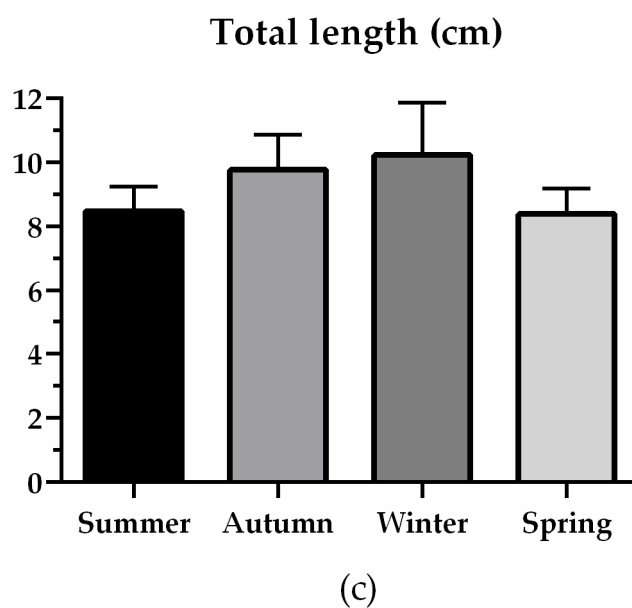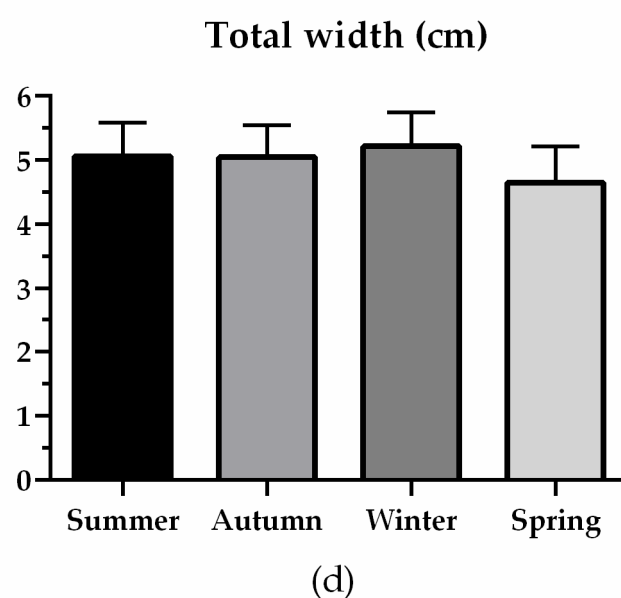

**Figure S1.** (a) Total weight variation in grams; (b) total height variation in centimeters, (c) total length variation in centimeters; (d) total width variation in centimeters of oysters during each season.

**Table S1.** Summary of the methodology used for bacteriologic analysis.

| Microorganism                      | Method                 | Revitalization period                     |                   |                     | Selective period |                     |          |
|------------------------------------|------------------------|-------------------------------------------|-------------------|---------------------|------------------|---------------------|----------|
|                                    |                        | Medium                                    | T (°C)            | duration            | Medium           | T (°C)              | duration |
| <i>Total aerobic microorganism</i> | ISO 4833-1<br>ISO 6222 | BPW <sup>(1,2)</sup><br>NA <sup>(3)</sup> | Room              |                     | PCA              | 7 <sup>(1)</sup>    | 72h      |
|                                    |                        |                                           | temperature       | 1h <sup>(1,2)</sup> |                  | 22 <sup>(3)</sup>   | 72h      |
|                                    |                        |                                           | <sup>(1,2)</sup>  | NA <sup>(3)</sup>   |                  | 30 <sup>(1,2)</sup> | 72h      |
|                                    |                        |                                           | NA <sup>(3)</sup> |                     |                  | 37 <sup>(3)</sup>   | 48h      |

|                                             |                            |                                           |                                                        |                                          |                      |    |             |
|---------------------------------------------|----------------------------|-------------------------------------------|--------------------------------------------------------|------------------------------------------|----------------------|----|-------------|
| <i>Marine heterotrophic bacteria</i>        | ILM                        | BPW <sup>(1,2)</sup><br>NA <sup>(3)</sup> | Room temperature <sup>(1,2)</sup><br>NA <sup>(3)</sup> | 1h <sup>(1,2)</sup><br>NA <sup>(3)</sup> | MA                   | 21 | 48h         |
| <i>E. coli</i>                              | ISO 16649-2<br>ISO 16649-3 | BPW                                       | Room temperature                                       | 1h                                       | TBX                  | 44 | 24h         |
| <i>Salmonella</i> spp.                      | ISO 6579                   | MSRV                                      | 41,5                                                   | 24h                                      | XLD                  | 37 | 24h         |
| <i>C. perfringens</i>                       | ISO 7937                   | NA                                        | NA                                                     | NA                                       | TSC                  | 37 | 20h         |
| Coagulase-positive<br><i>Staphylococcus</i> | ISO 6888-3                 | BPW                                       | Room temperature                                       | 1h                                       | BP                   | 37 | 48h         |
| <i>Enterococcus</i> spp.                    | ISO 7899-2                 | BPW                                       | Room temperature                                       | 1h                                       | SB                   | 37 | 48h         |
| <i>L. monocytogenes</i>                     | ISO 11290-1                | Half-Fraser broth                         | 37                                                     | 24h                                      | Compass®<br>Listeria | 37 | 24h         |
| Yeasts and molds                            | ISO 21527-2                | BPW                                       | Room temperature                                       | 1h                                       | Sab                  | 25 | 5 to 7 days |
| <i>Pseudomonas</i> spp.                     | ILM                        | BPW                                       | Room temperature                                       | 1h                                       | CFC                  | 30 | 48h         |

<sup>(1)</sup> Edible portion; <sup>(2)</sup> Intra-valvular liquid, superficial biofilm and hemolymph, <sup>(3)</sup> Farming water column samples, BP: Baird-Parker medium, BPW: Buffered Peptone Water, CFC: Cephaloridine Fucidin Cetrimide medium, ILM: internal laboratory method, MA: Marine Agar medium, MSRV: Modified Semi-solid Rappaport-Vassiliadis, NA: not applicable, PCA: Plate Count Agar medium, Sab: Sabourau medium, SB: Slanetz and Bartley medium, TSC: Tryptose Sulfite Cycloserine agar, XLD: Xylose Lysine Deoxycholate agar.

**Table S2.** Summary of morphological parameters throughout the seasons.

| Parameter    | Season | Average | SD   | Max   | Min  | 95% CI |      | p-value |
|--------------|--------|---------|------|-------|------|--------|------|---------|
|              |        |         |      |       |      | L      | U    |         |
| Total weight | Summer | 71.6    | 10.9 | 103.0 | 55.7 | 66.7   | 76.6 | ****    |
|              | Autumn | 75.0    | 9.9  | 88.10 | 48.7 | 71.0   | 79.0 |         |
|              | Winter | 84.3    | 18.5 | 131.7 | 65.9 | 81.2   | 94.1 |         |
|              | Spring | 56.9    | 5.0  | 67.0  | 49.0 | 55.1   | 58.6 |         |
| Total height | Summer | 2.7     | 0.4  | 3.3   | 1.9  | 2.5    | 2.8  | ****    |
|              | Autumn | 3.0     | 0.5  | 4.0   | 2.1  | 2.8    | 3.2  |         |
|              | Winter | 3.0     | 0.3  | 3.9   | 2.6  | 2.9    | 3.2  |         |
|              | Spring | 2.6     | 0.4  | 3.5   | 1.6  | 2.4    | 2.7  |         |
| Total length | Summer | 8.4     | 0.8  | 9.6   | 7.3  | 8.1    | 8.8  | ****    |
|              | Autumn | 9.8     | 1.1  | 11.7  | 7.5  | 9.3    | 10.2 |         |
|              | Winter | 10.2    | 1.6  | 12.7  | 3.6  | 9.6    | 10.9 |         |
|              | Spring | 8.4     | 0.8  | 9.8   | 7.2  | 8.1    | 8.7  |         |
| Total width  | Summer | 5.1     | 0.5  | 6.1   | 3.9  | 4.8    | 5.3  | ***     |
|              | Autumn | 5.0     | 0.5  | 6.0   | 4.1  | 4.8    | 5.2  |         |
|              | Winter | 5.2     | 0.5  | 6.2   | 4.0  | 5.0    | 5.4  |         |
|              | Spring | 4.7     | 0.6  | 6.1   | 3.6  | 4.4    | 4.8  |         |

SD: standard deviation, Max: maximum, Min: minimum, CI: confidence interval, L—Lower limit; U—Upper limit, \*  $p \leq 0.05$ , \*\*  $p \leq 0.01$ , \*\*\*  $p \leq 0.001$ , \*\*\*\*  $p \leq 0.0001$  p-value was calculated by one-way ANOVA.
